# Supplementary material for: Surface Functionalization of Ureteral Stents-Based Polyurethane: Engineering Antibacterial Coatings
Source: MDPI journal article supplement (doi:10.3390/ma15051676), 2022-02-23
Supplement: s1 [file s1]

Supplementary Materials

# Surface Functionalization of Ureteral Stents-Based Polyurethane: Engineering Antibacterial Coatings

Kardelen Ecevit <sup>1,2</sup>, Eduardo Silva <sup>1,2</sup>, Luísa C. Rodrigues <sup>1,2</sup>, Ivo Aroso <sup>1,2</sup>, Alexandre A. Barros <sup>1,2</sup>, Joana M. Silva <sup>1,2,\*</sup> and Rui L. Reis <sup>1,2</sup>

- <sup>1</sup> 3B's Research Group, I3Bs—Research Institute on Biomaterials, Biodegradables and Biomimetics, University of Minho, Headquarters of the European Institute of Excellence on Tissue Engineering and Regenerative Medicine, Avepark, Parque de Ciência e Tecnologia, Zona Industrial da Gandra, 4805-017 Barco GMR, Portugal; kardelen.ecevit@i3bs.uminho.pt (K.E.); eduardo.silva@i3bs.uminho.pt (E.S.); luisa.rodrigues@i3bs.uminho.pt (L.C.R.); ivo.aroso@i3bs.uminho.pt (I.A.); ip@i3bs.uminho.pt (A.A.B.); rgreis@i3bs.uminho.pt (R.L.R.)
- <sup>2</sup> ICVS/3B's PT Government Associated Laboratory, 4805-017 Guimaraes, Portugal
- \* Correspondence: joana.marques@i3bs.uminho.pt

**Citation:** Ecevit, K.; Silva, E.; Rodrigues, L. C.; Aroso, I.; Barros, A.A.; Silva, J.M.; Reis, R.L. Surface Functionalization of Ureteral Stents-Based Polyurethane: Engineering Antibacterial Coatings. *Materials* **2022**, *15*, 1676. <https://doi.org/10.3390/ma15051676>

Academic Editor: Anton Nikiforov

Received: 29 December 2021

Accepted: 14 February 2022

Published: 23 February 2022

**Publisher's Note:** MDPI stays neutral with regard to jurisdictional claims in published maps and institutional affiliations.

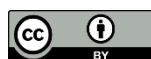

**Copyright:** © 2022 by the authors. Licensee MDPI, Basel, Switzerland. This article is an open access article distributed under the terms and conditions of the Creative Commons Attribution (CC BY) license (<https://creativecommons.org/licenses/by/4.0/>).

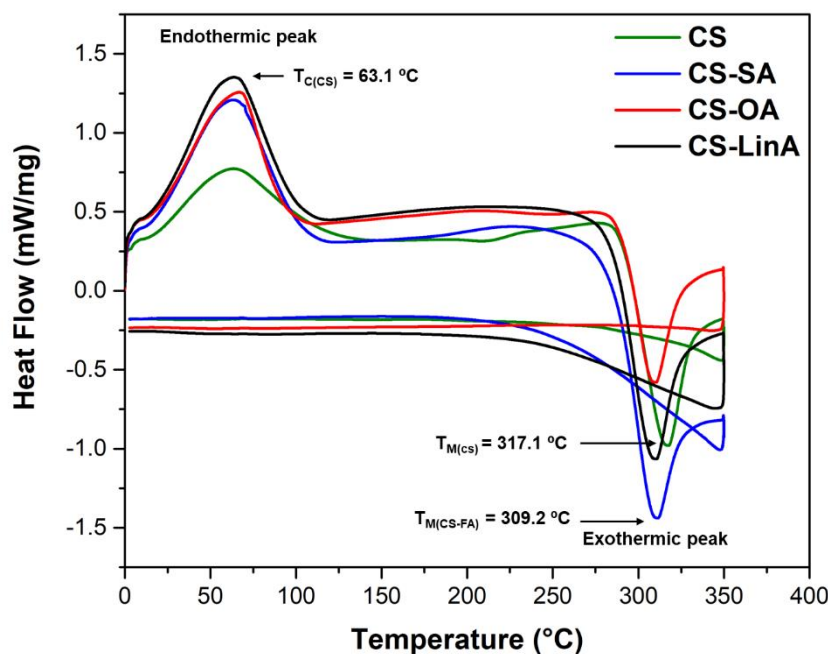

**Figure S1.** DSC thermograms for CS and synthesized CS-FA derivatives.

**Table S1.** Elemental composition (% C, N, O) of untreated PU stent, acrylic acid-modified PU stent (PU-AAc) and CS-FA derivatives coated PU stents.

|            | ATOMIC CONCENTRATION [%] |              |             |
|------------|--------------------------|--------------|-------------|
|            | C                        | O            | N           |
| PU         | 79.64 ± 0.24             | 17.02 ± 0.07 | 3.34 ± 0.01 |
| PU-AAC     | 75.97 ± 0.66             | 19.80 ± 0.80 | 1.61 ± 1.5  |
| CS-PU      | 70.97 ± 2.59             | 24.23 ± 3.32 | 2.93 ± 0.96 |
| CS-SA-PU   | 71.78 ± 2.16             | 21.74 ± 1.53 | 3.38 ± 0.86 |
| CS-OA-PU   | 68.29 ± 3.39             | 23.93 ± 2.03 | 4.79 ± 0.15 |
| CS-LINA-PU | 71.74 ± 1.01             | 22.15 ± 0.78 | 3.85 ± 0.24 |

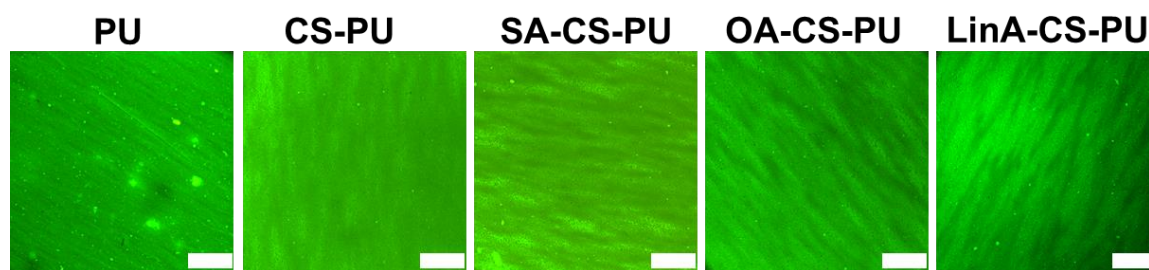**Figure S2.** Live/dead fluorescence assay performed on all formulations to infer background effect of the counterparts: Images of the outer surface of untreated PU stent (control), CS-PU, CS-SA-PU, CS-OA-PU and CS-LinA-PU. Scale bar is 100 µm.
